# Supplementary material for: Highly regioselective bioconversion of ginsenoside Re into 20(S/R)-Rf2 by an optimized culture ofCordyceps sinensis
Source: Royal Society of Chemistry journal article supplement (doi:10.1039/d0nj01828g), 2020-01-01
Supplement: d0nj01828g1.pdf [file d0nj01828g1.pdf]

## *Supplementary Materials*

### **Highly regioselective bioconversion of ginsenoside Re into 20(S/R)-Rf2 by an optimized culture of *Cordyceps Sinensis***

Weinan Wang <sup>a</sup>, Jishuang Liu <sup>a</sup>, Yu Xin <sup>a</sup>, Tianzhu He <sup>a</sup>, Ye Qiu <sup>b</sup>, Mo Qu <sup>a</sup>, Yan Song <sup>a\*</sup> and Zhidong Qiu <sup>a\*</sup>

---

*a. Changchun University of Chinese Medicine, Changchun 130117, China.*

*b. National Engineering Laboratory for Druggable Gene and Protein Screening, Northeast Normal University, Changchun 130117, China.*

*\*Correspondence 1: songye@tom.com (Y.S.);*

*\*Correspondence 2: qzdcczy@163.com (Z.Q.).*

## 1. Supplementary Figures

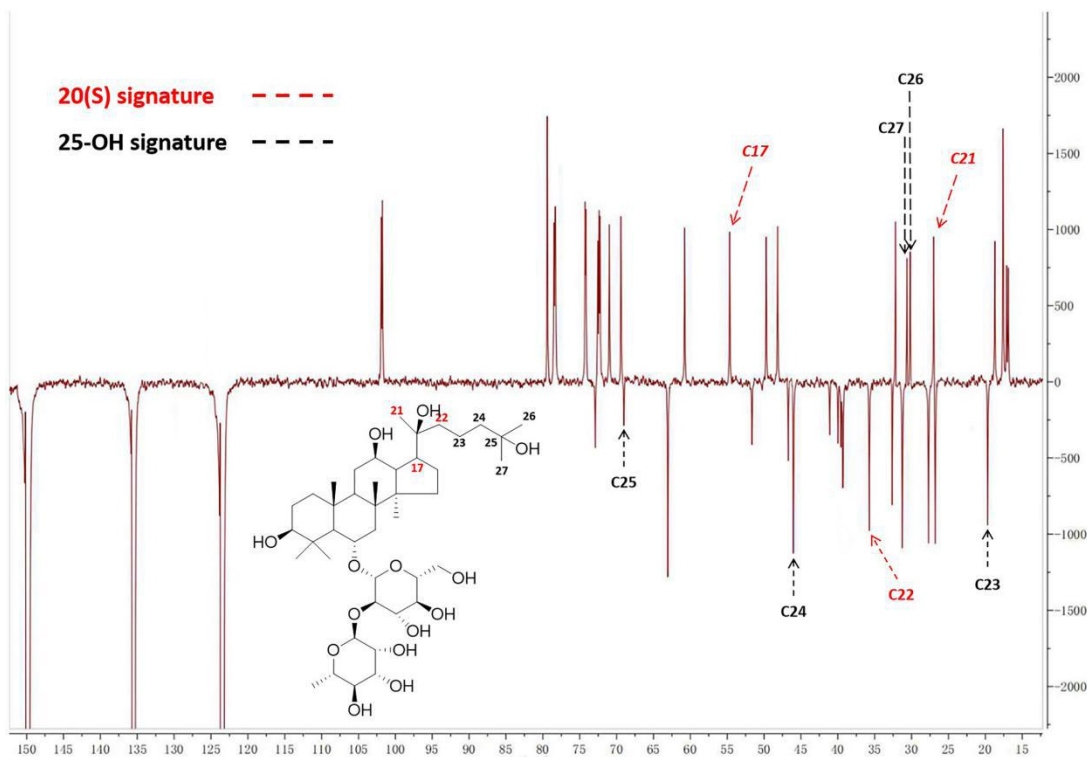

**Supplementary Figure 1. <sup>13</sup>C-NMR spectrum for peak 1**

Bars pointed downward represent secondary and quaternary carbons

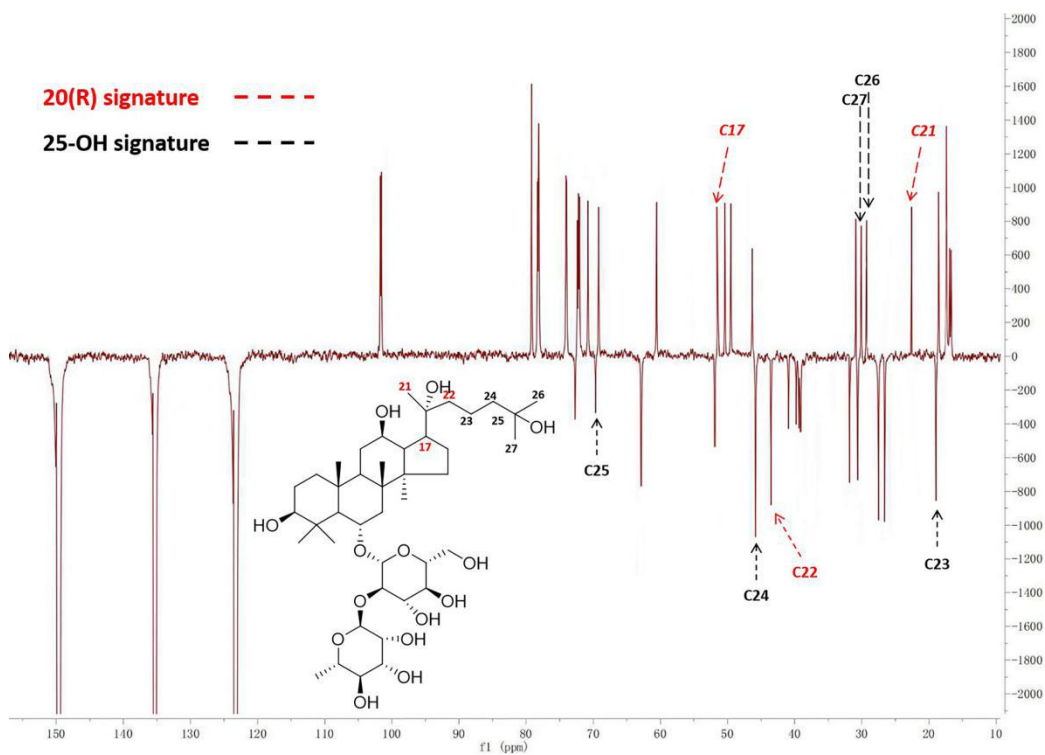

**Supplementary Figure 2. <sup>13</sup>C-NMR spectrum for peak 2**

Bars pointed downward represent secondary and quaternary carbons

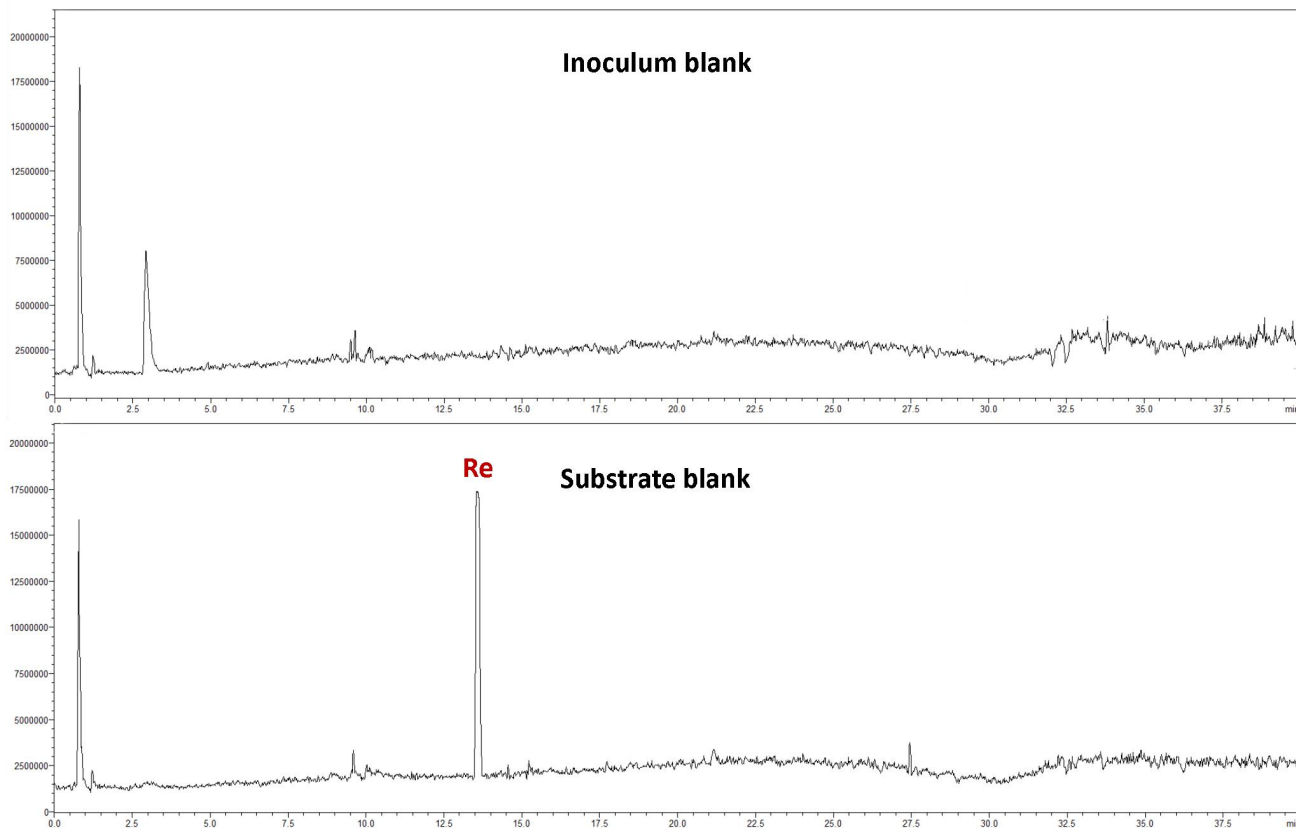

**Supplementary Figure 3.** Blank controls for the microbial transformation of ginsenoside Re

## 2. Supplementary Tables

**Supplementary Table 1.** Calibration curves for standard ginsenosides and authentic metabolites

| Ginsenoside | Linear regression equations | R <sup>2</sup> | Linearity range (µg/ml) |
|-------------|-----------------------------|----------------|-------------------------|
| Re          | $y = 5.8899x + 0.7175$      | 0.9991         | 7.5-480                 |
| 20(S)-Rg2   | $y = 10.959x + 0.8903$      | 0.9989         | 7.5-480                 |
| 20(R)-Rg2   | $y = 10.71x + 0.883$        | 0.999          | 7.5-480                 |
| 20(S)-Rf2   | $y = 10.464x + 0.6447$      | 0.9947         | 7.5-480                 |
| 20(R)-Rf2   | $y = 9.6218x + 0.6905$      | 0.9966         | 7.5-480                 |
